# Supplementary material for: Comparative Analysis of Regional Blood-Brain Barrier Permeability in Humans and Rodents: An Evolutionary Perspective
Source: Research Square preprint supplement (doi:10.21203/rs.3.rs-9869051/v1), 2026-06-15
Supplement: Supplementary file 1 [file b961b90a182dc4ce98e2b82f.docx]

**Additional Figure Legend**

Additional Figure 1. Anatomically defined brain lobes used for regional BBB permeability analysis. Representative axial brain slices illustrating the grouping of 124 brain regions into 10 anatomically defined lobes used for regional analysis of BBB permeability and plasma volume fraction (vₚ). Color-coded regions correspond to the frontal cortex, limbic system, parietal cortex, temporal cortex, occipital cortex, cerebellum, basal ganglia, diencephalon, white matter, and brainstem. The list of anatomical regions included within each lobe is shown below the corresponding color label. Brain regions were defined based on the MNI atlas implemented in SPM12. BBB: blood-brain barrier; MNI: Montreal Neurological Institute; SPM: Statistical Parametric Mapping.

Additional Figure 2. Anatomically defined rat brain regions used for regional BBB permeability analysis. Representative coronal rat brain slices illustrating the grouping of anatomically defined brain regions used for regional BBB permeability analysis. Color-coded regions correspond to the limbic system, diencephalon, basal ganglia, cerebellum, and brainstem. The anatomical structures included within each region are listed below the corresponding color label. Brain segmentation was performed manually based on a rat brain atlas as described in the Methods section. BBB: blood-brain barrier.

Additional Figure 3. Sex-specific regional differences in BBB permeability and plasma volume fraction in healthy young individuals. A. Median normalized BBB permeability values across anatomically defined brain lobes in males (n = 18) and females (n = 17). B. Median normalized fractional plasma volume (vₚ) values across lobes in males (n = 18) and females (n = 17). C. Median normalized BBB permeability normalized to vₚ across lobes in males (n = 18) and females (n = 17). Data are shown as median ± standard error. Brainstem-normalized values were used for regional comparisons as described in the Methods section. Statistical analysis was performed using the Mann–Whitney U test with correction for multiple comparisons using false FDR. *p < 0.05, **p < 0.01, ***p < 0.001. BBB: blood-brain barrier; FDR: False discovery rate.

Additional Figure 4. Age-related whole-brain and lobe-wise brain volume changes in healthy individuals. A. Association between whole-brain volume (%) and age in males (dark gray; Pearson *p* < 0.00001, *r*= -0.83, n = 45) and females (light gray; Pearson *p* < 0.0001, *r* = -0.65, n = 57). Linear regression lines with 95% confidence intervals are shown. Whole-brain volume decreased significantly with age in both sexes, with a steeper decline observed in males. Each dot represents an individual participant. B. Brain maps showing the Pearson correlation coefficient (*r*) between regional brain volume and age in females (upper panel) and males (lower panel). Darker red indicates a stronger negative correlation between age and regional brain volume. Only regions that remained significant after correction for multiple comparisons using FDR (q = 0.05) are displayed. Brain regions are shown on representative axial slices moving from anterior to posterior regions. BBB: blood-brain barrier. FDR: False discovery rate.

Additional Figure 5. Association between brain volume and BBB permeability in healthy individuals. A. Association between whole-brain BBB permeability (%) and whole-brain volume (%) in males (dark gray; *p* < 0.001, *r* = -0.53, n = 45) and females (light gray; *p* = 0.64, *r* = -0.06, n = 57). Linear regression lines with 95% confidence intervals are shown. Increased BBB permeability was associated with lower brain volume in males, whereas no significant association was observed in females. Each dot represents an individual participant. B. Brain maps showing the Pearson correlation coefficient (*r*) between regional brain volume and regional BBB permeability in females (upper panel) and males (lower panel). Blue regions indicate negative correlations between BBB permeability and brain volume, whereas red regions indicate positive correlations. Only regions that remained significant after correction for multiple comparisons using FDR (q = 0.05) are displayed. Brain regions are shown on representative axial slices moving from anterior to posterior regions. BBB: blood-brain barrier; FDR: false discovery rate.

**Additional Figure**

Additional Figure 1

Additional Figure 2

Additional Figure 3

Additional Figure 4

Additional Figure 5

**Additional Tables**

Additional Table 1. Lobe-wise association between BBB permeability and age in females and males.

|  | Females | | Males | |
| --- | --- | --- | --- | --- |
| *r* | *p* | *r* | *p* |
| Brainstem | 0.134 | 0.321 | 0.399 | **0.007** |
| White matter | 0.241 | 0.148 | 0.519 | **0.0008** |
| Diencephalon | 0.184 | 0.192 | 0.357 | **0.0159** |
| Basal Ganglia | 0.293 | 0.097 | 0.49 | **0.001** |
| Cerebellum | 0.22 | 0.148 | 0.48 | **0.001** |
| Limbic | 0.29 | 0.096 | 0.408 | **0.007** |
| Temporal | 0.183 | 0.192 | 0.465 | **0.002** |
| Occipital | 0.218 | 0.148 | 0.526 | **0.0008** |
| Parietal | 0.33 | 0.096 | 0.486 | **0.001** |
| Frontal | 0.221 | 0.148 | 0.564 | **0.0005** |

The table summarizes the association between age and lobe-wise suprathreshold BBB permeability normalized to fractional plasma volume (vₚ). Pearson p-value (*p*) and correlation coefficient (*r*) are reported across brain lobes for females (47.1 17 years, n = 57) and males (44.3 18 years, n = 45). P-values are corrected for multiple comparisons using FDR with q=0.05. BBB: blood-brain barrier. FDR: False discovery rate.

Additional Table 2. Lobe-wise association between brain volume and age in females and males.

|  | Females | | Males | |
| --- | --- | --- | --- | --- |
| *r* | *p* | *r* | *p* |
| Brainstem | 0.331 | **0.017** | 0.141 | 0.357 |
| White matter | -0.351 | **0.015** | -0.561 | **0.000124** |
| Diencephalon | -0.426 | **0.002** | -0.828 | **< 0.0001** |
| Basal Ganglia | -0.334 | **0.017** | -0.441 | **0.003** |
| Cerebellum | -0.261 | 0.056 | -0.52 | **0.00042** |
| Limbic | -0.112 | 0.409 | -0.346 | **0.002** |
| Temporal | -0.43 | **0.002** | -0.595 | **< 0.0001** |
| Occipital | -0.309 | **0.024** | -0.456 | **0.002** |
| Parietal | -0.479 | **0.001** | -0.598 | **< 0.0001** |
| Frontal | -0.66 | **< 0.0001** | -0.671 | **< 0.0001** |

The table summarizes the association between age and lobe-wise brain volume. Pearson p-value (*p*) and correlation coefficient (*r*) are reported across brain lobes for females (47.1 17 years, n = 57) and males (44.3 18 years, n = 45). P-values are corrected for multiple comparisons using FDR with q=0.05. FDR: False discovery rate.

Additional Table 3. Lobe-wise association between brain volume and BBB permeability in females and males.

|  | Females | | Males | |
| --- | --- | --- | --- | --- |
| *r* | *p* | *r* | *p* |
| Brainstem | 0.026 | 0.996 | -0.215 | 0.194 |
| White matter | 0.005 | 0.996 | -0.318 | 0.084 |
| Diencephalon | 0.117 | 0.86 | -0.409 | **0.044** |
| Basal Ganglia | -0.046 | 0.996 | -0.168 | 0.3 |
| Cerebellum | -0.019 | 0.996 | -0.094 | 0.539 |
| Limbic | -0.107 | 0.86 | -0.299 | 0.092 |
| Temporal | -0.001 | 0.996 | -0.249 | 0.165 |
| Occipital | -0.189 | 0.86 | -0.366 | **0.044** |
| Parietal | -0.136 | 0.86 | -0.22 | 0.194 |
| Frontal | -0.119 | 0.86 | -0.378 | **0.044** |

The table summarizes the association between lobe-wise BBB permeability and brain volume. Pearson p-value (*p*) and correlation coefficient (*r*) are reported across brain lobes for females (47.1 17 years, n = 57) and males (44.3 18 years, n = 45). P-values are corrected for multiple comparisons using FDR with q=0.05. BBB; Blood-brain barrier; FDR: False discovery rate.
